# Supplementary material for: TLR3 Is a Negative Regulator of Immune Responses Against Paracoccidioides brasiliensis
Source: PubMed Central journal article supplement (PMC6335947; doi:10.3389/fcimb.2018.00426), 2019-01-10
Supplement: Image_1.pdf [file Image_1.pdf]

## Material and Methods

### Flow Cytometry Assay

To analyze the phenotype of the cells in the lung after infection (30 days), the total cells were obtained and analyzed by flow cytometry with a FACS Canto II (Becton Dickinson). To analyze DC and NK cells, the cells were stained with APC CD11c (N418), APC NK1.1 (PK136). To analyze the IL-17<sup>+</sup>CD4<sup>+</sup> and IFN- $\gamma$ <sup>+</sup> CD4<sup>+</sup> T cells, the lungs cells were incubated with Brefeldin A for 12 hours. After that, the CD8<sup>+</sup>T cells were stained with PerCP CD3e (145-2C11) and FITC CD4 (RM4-5) and then we used the fixation and permeabilization kit (eBioscience) according to the manufacturer's protocol. The FITC-IFN- $\gamma$  and PE-IL-17 antibody were added and then the CD8<sup>+</sup>T cells were analyzed by flow cytometer. All antibodies were obtained from BD Biosciences (San Jose, CA). The flow cytometry data were analyzed using FlowJo. Fluorescence-minus-one (FMO) tubes were used as additional controls.

## Results

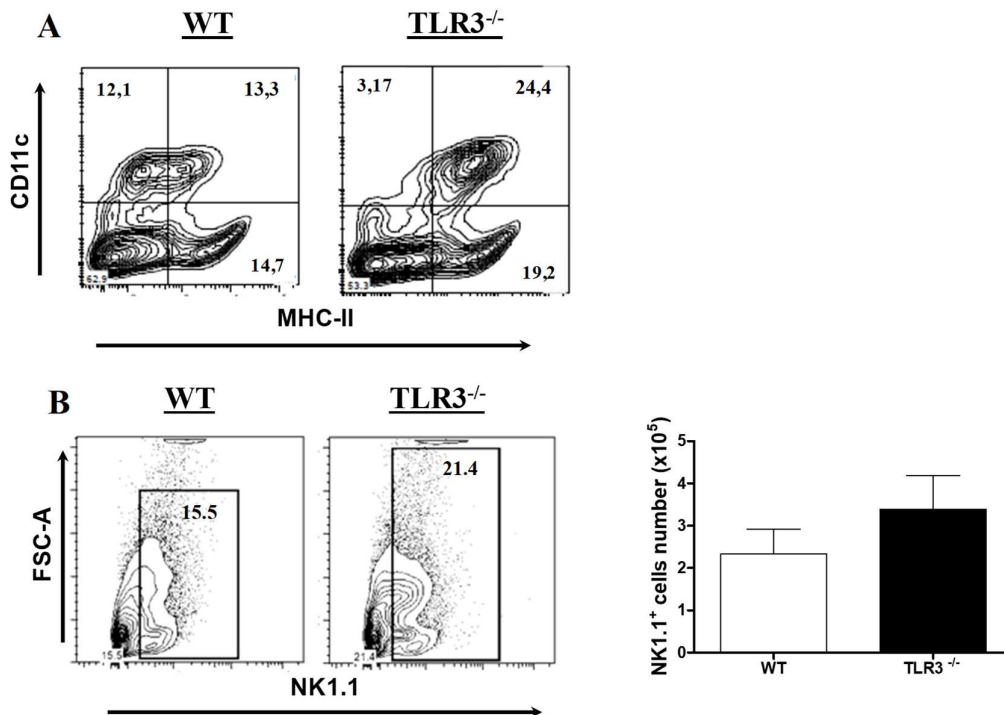

**Supplementary Figure 1. DC and pulmonary NK cells do not show any difference between lineages.** WT and TLR3<sup>-/-</sup> mice (seven/group) were infected with 1x10<sup>6</sup> of Pb18 yeast for 30 days and (A) total CD11c<sup>+</sup>/MHC-II<sup>+</sup> and (B) NK cells from lung tissue were investigated by flow cytometry.

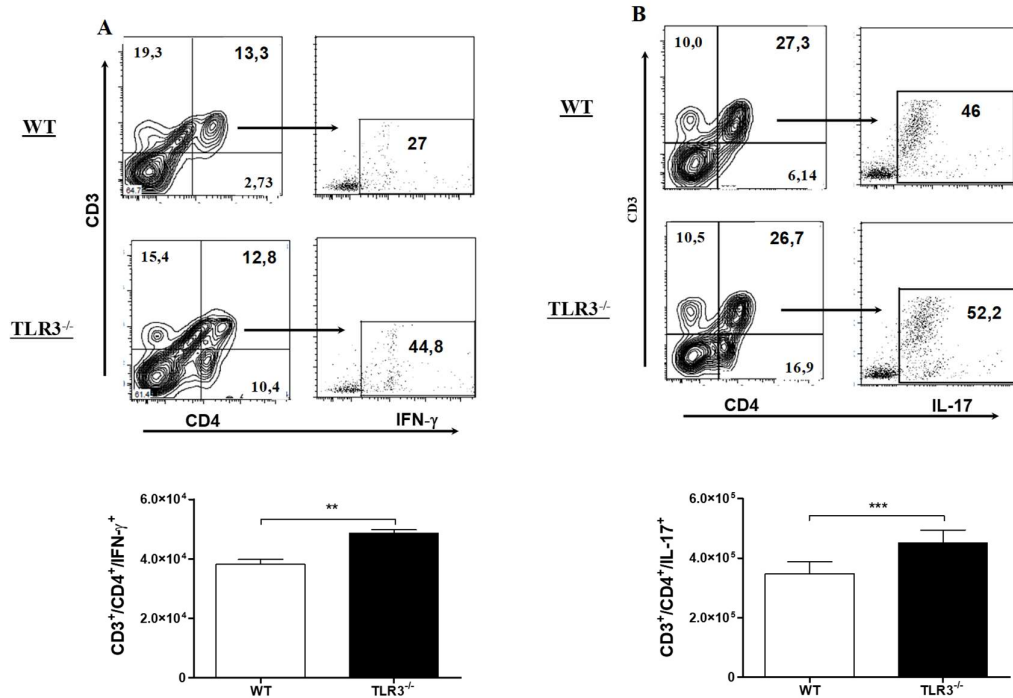

**Supplementary Figure 2. CD4<sup>+</sup> T cells increased in the lung of TLR3<sup>-/-</sup> mice.** WT and TLR3<sup>-/-</sup> mice (seven/group) were infected with 1x10<sup>6</sup> of Pb18 yeast for 30 days and total pulmonary CD4<sup>+</sup>T cells (A) IFN-g and (B) IL-17 intracellular cytokines produced were investigated by flow cytometer and the results were measured from mix of lung from seven animals. (\* P< 0.05, \*\*P <0,001 and \*\*\*P<0.0001).
